# Supplementary material for: The Effects of Acid and Water in the Formation of Anodic Alumina: DFT and Experiment Study
Source: Molecules. 2023 Mar 7;28(6):2427. doi: 10.3390/molecules28062427 (PMC10052643; doi:10.3390/molecules28062427)
Supplement: Supplementary file 1 [file molecules-28-02427-s001.zip › molecules-2207820-supplementary.pdf]

*Supplementary Materials*

# The Effects of Acid and Water in the Formation of Anodic Alumina: DFT and Experiment Study

Zhengwei Zhang <sup>1,\*</sup>, Jin Kang <sup>1</sup>, Xiaodong Li <sup>1</sup>, Ping Li <sup>1</sup>, Yali Du <sup>1</sup>, Yufan Qin <sup>1</sup>, Ningyi Li <sup>1</sup> and Jiebin Li <sup>2</sup>

<sup>1</sup> High Value Fine Chemicals Research Center, Department of Chemistry & Chemical Engineering, Jinzhong University, Jinzhong 030619, China

<sup>2</sup> Shaanxi Applied Physics and Chemistry Research Institute, Xi'an 710061, China

\* Correspondence: zhangzhw1225@163.com

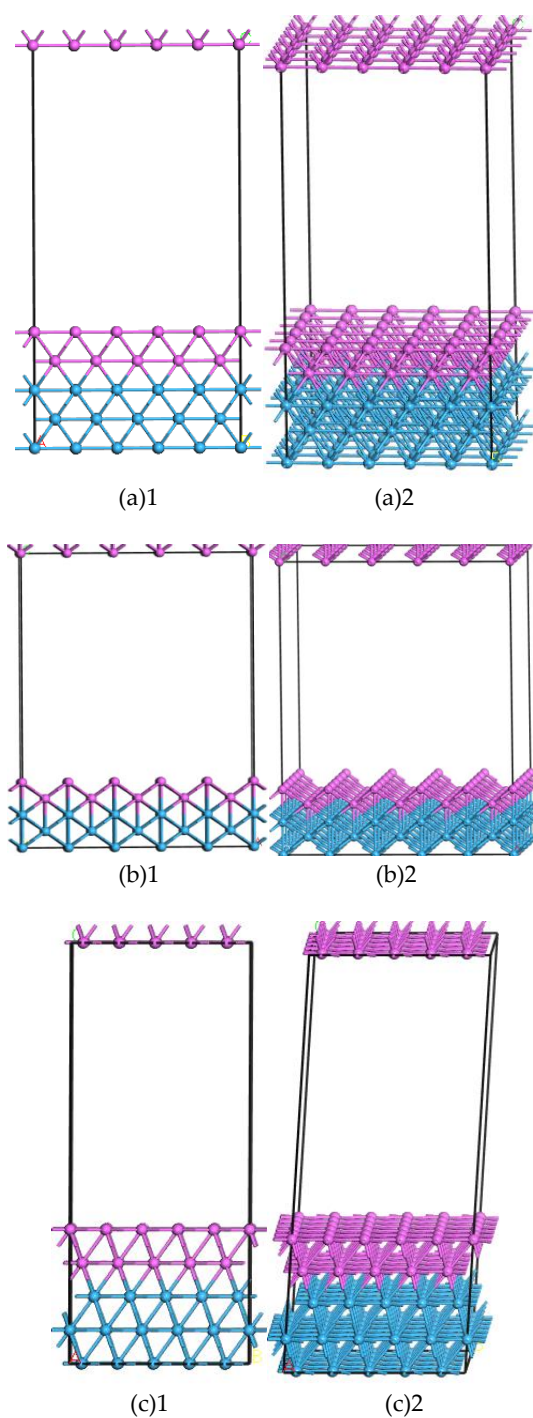

**Figure S1.** The aluminium slabs of three faces. The coordinates of the blue atoms are fixed, other atoms relax freely.

(a)1: the side view of (100) slab; (a)2: the oblique view of (100) slab;  
 (b)1: the side view of (110) slab; (b)2: the oblique view of (110) slab;  
 (c)1: the side view of (111) slab; (c)2: the oblique view of (111) slab.

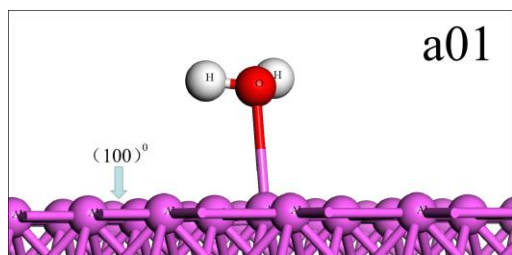

(a)01

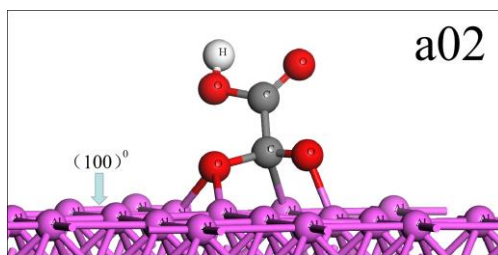

(a)02

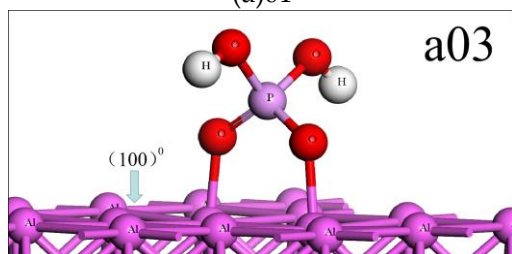

(a)03

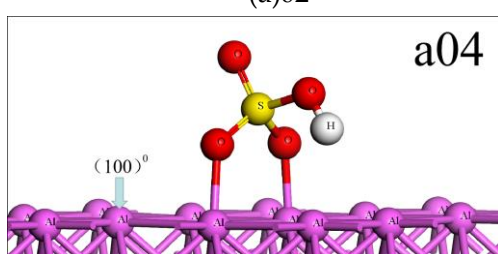

(a)04

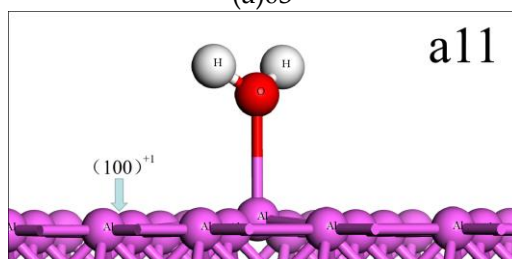

(a)11

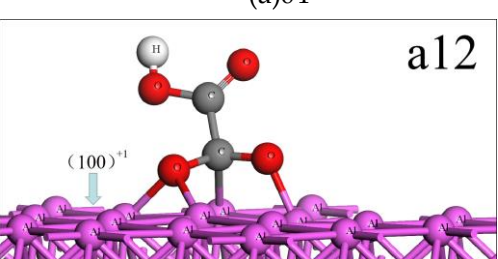

(a)12

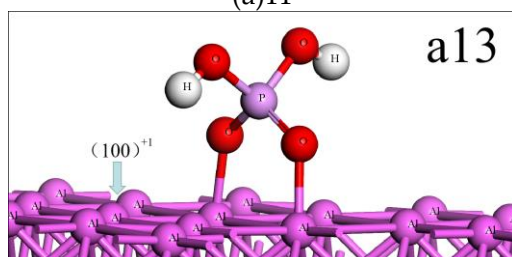

(a)13

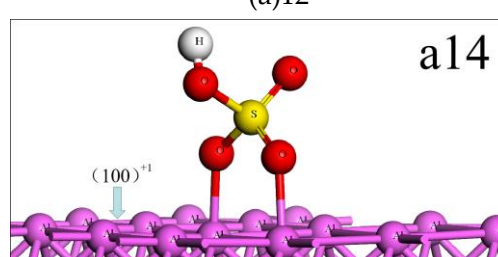

(a)14

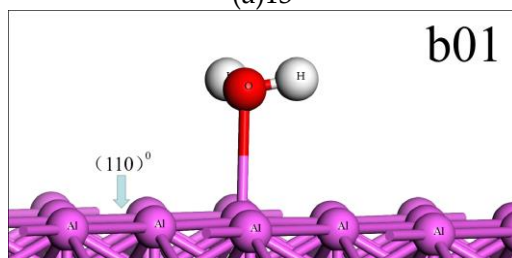

(b)01

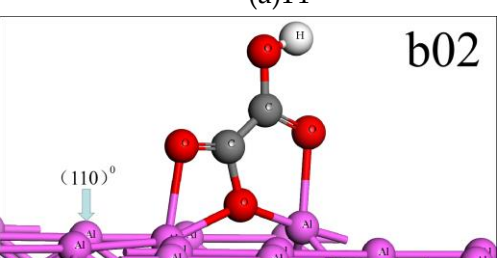

(b)02

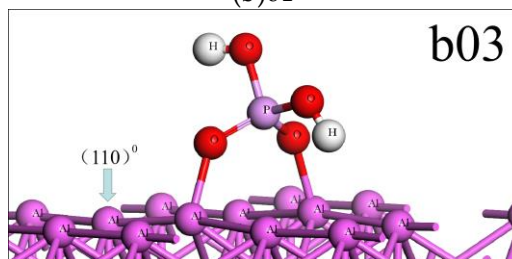

(b)03

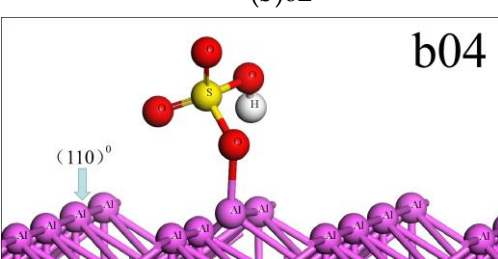

(b)04

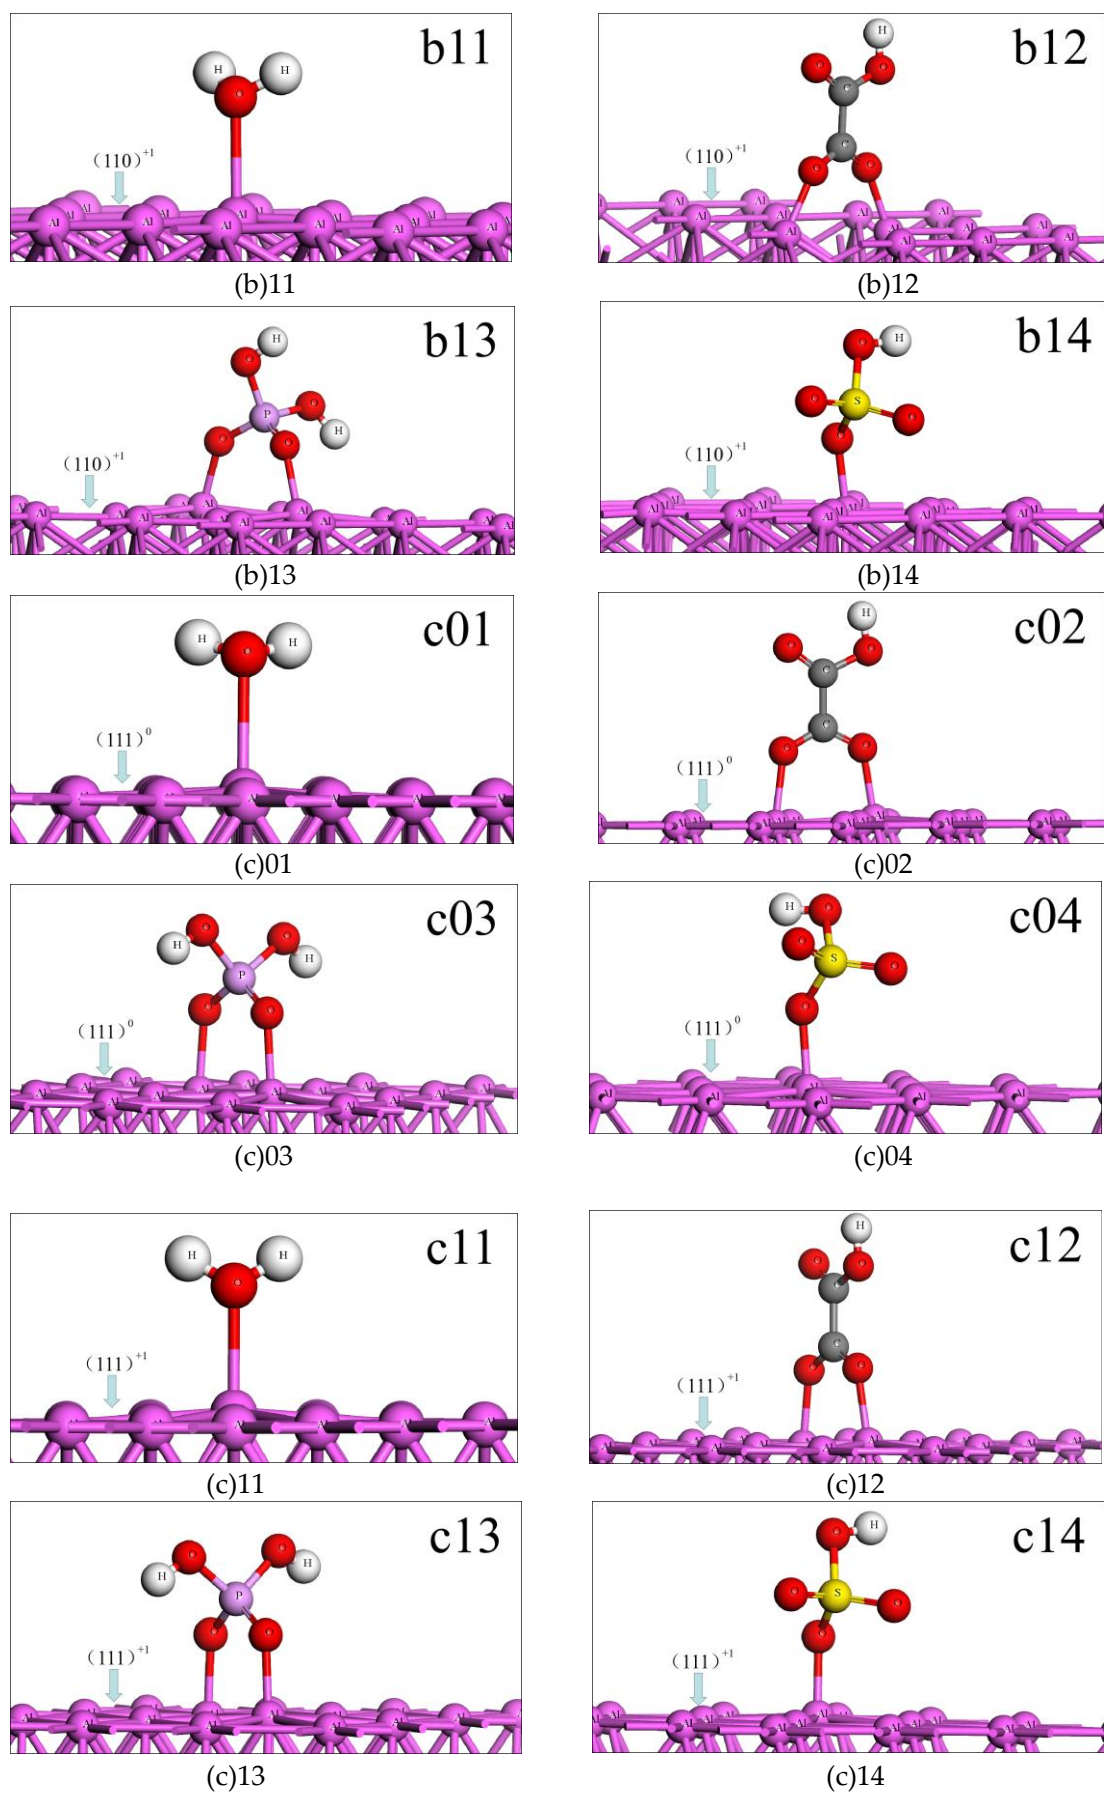

**Figure S2.** The acid radicals and water adsorb on the natural and positively charged slabs.  
(a)01: the H<sub>2</sub>O adsorbs on the natural (100) slab; (a)02: the HCO<sub>3</sub><sup>-</sup> adsorbs on the natural (100)

salb; (a)03: the  $\text{H}_2\text{PO}_4^-$  adsorbs on the natural (100) salb; (a)04: the  $\text{HSO}_4^-$  adsorbs on the natural (100) salb; (a)11: the  $\text{H}_2\text{O}$  adsorbs on the positively charged (100) salb; (a)12: the  $\text{HC}_2\text{O}_4^-$  adsorbs on the positively charged (100) salb; (a)13: the  $\text{H}_2\text{PO}_4^-$  adsorbs on the positively charged (100) salb; (a)14: the  $\text{HSO}_4^-$  adsorbs on the positively charged (100) salb.

(b)01: the  $\text{H}_2\text{O}$  adsorbs on the natural (110) salb; (b)02: the  $\text{HC}_2\text{O}_4^-$  adsorbs on the natural (110) salb; (b)03: the  $\text{H}_2\text{PO}_4^-$  adsorbs on the natural (110) salb; (b)04: the  $\text{HSO}_4^-$  adsorbs on the natural (110) salb; (b)11: the  $\text{H}_2\text{O}$  adsorbs on the positively charged (110) salb; (b)12: the  $\text{HC}_2\text{O}_4^-$  adsorbs on the positively charged (110) salb; (b)13: the  $\text{H}_2\text{PO}_4^-$  adsorbs on the positively charged (110) salb; (b)14: the  $\text{HSO}_4^-$  adsorbs on the positively charged (110) salb.

(c)01: the  $\text{H}_2\text{O}$  adsorbs on the natural (111) salb; (c)02: the  $\text{HC}_2\text{O}_4^-$  adsorbs on the natural (111) salb; (c)03: the  $\text{H}_2\text{PO}_4^-$  adsorbs on the natural (111) salb; (c)04: the  $\text{HSO}_4^-$  adsorbs on the natural (111) salb; (c)11: the  $\text{H}_2\text{O}$  adsorbs on the positively charged (111) salb; (c)12: the  $\text{HC}_2\text{O}_4^-$  adsorbs on the positively charged (111) salb; (c)13: the  $\text{H}_2\text{PO}_4^-$  adsorbs on the positively charged (111) salb; (c)14: the  $\text{HSO}_4^-$  adsorbs on the positively charged (111) salb.

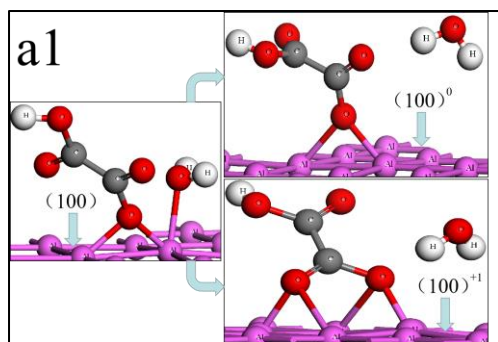

(a)1

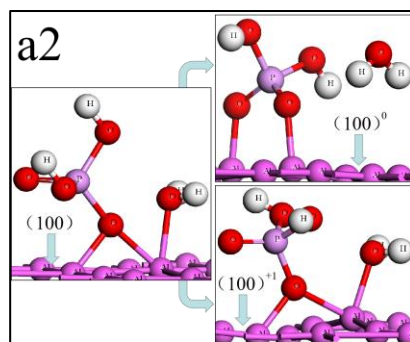

(a)2

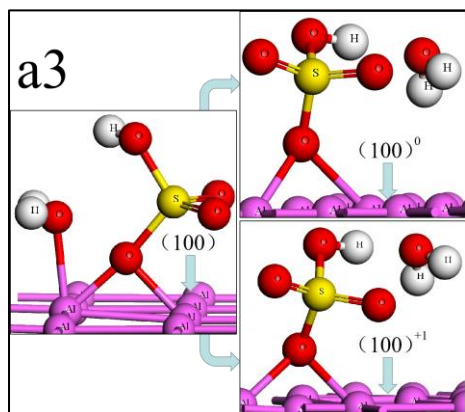

(a)3

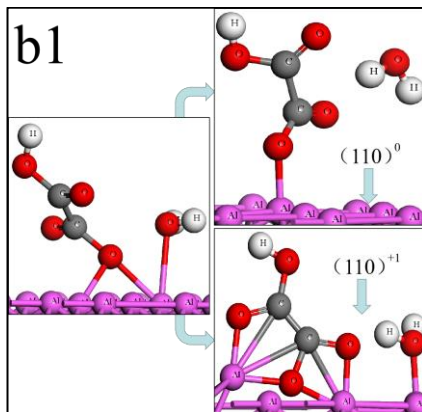

(b)1

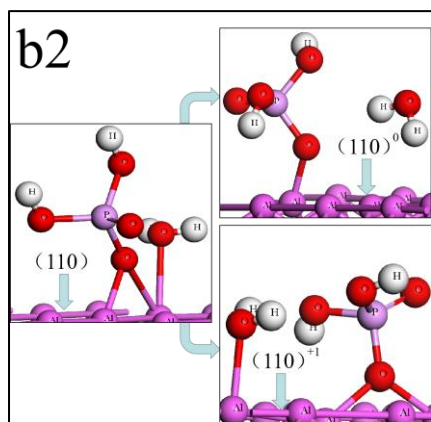

(b)2

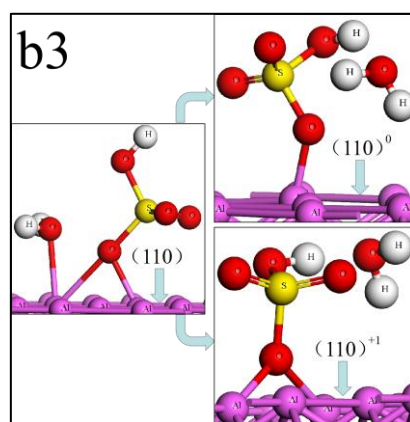

(b)3

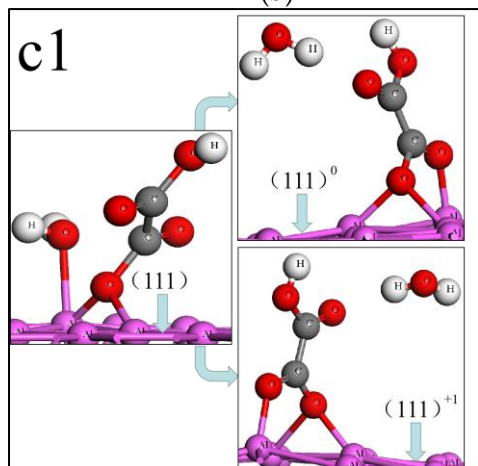

(c)1

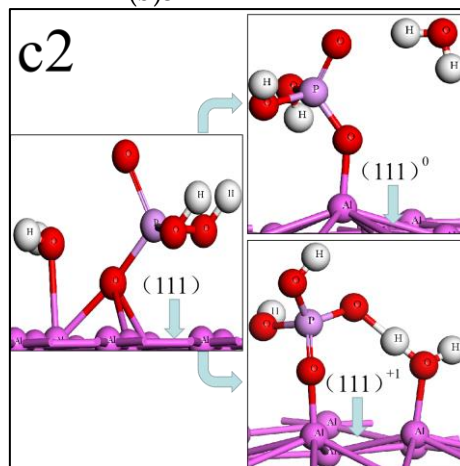

(c)2

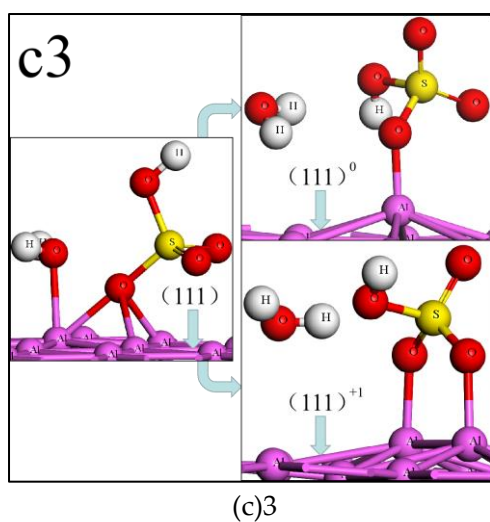

**Figure S3.** The acid radicals substitute water on the natural and positively charged slabs.

- (a)1: the  $\text{HC}_2\text{O}_4^-$  substitute  $\text{H}_2\text{O}$  on the natural and positively charged slab of (100);
- (a)2: the  $\text{H}_2\text{PO}_4^-$  substitute  $\text{H}_2\text{O}$  on the natural and positively charged slab of (100);
- (a)3: the  $\text{HSO}_4^-$  substitute  $\text{H}_2\text{O}$  on the natural and positively charged slab of (100);
- (b)1: the  $\text{HC}_2\text{O}_4^-$  substitute  $\text{H}_2\text{O}$  on the natural and positively charged slab of (110);
- (b)2: the  $\text{H}_2\text{PO}_4^-$  substitute  $\text{H}_2\text{O}$  on the natural and positively charged slab of (110);
- (b)3: the  $\text{HSO}_4^-$  substitute  $\text{H}_2\text{O}$  on the natural and positively charged slab of (110);
- (c)1: the  $\text{HC}_2\text{O}_4^-$  substitute  $\text{H}_2\text{O}$  on the natural and positively charged slab of (111);
- (c)2: the  $\text{H}_2\text{PO}_4^-$  substitute  $\text{H}_2\text{O}$  on the natural and positively charged slab of (111);
- (c)3: the  $\text{HSO}_4^-$  substitute  $\text{H}_2\text{O}$  on the natural and positively charged slab of (111);
